# Supplementary material
Source: MDPI journal article supplement (https://www.mdpi.com/2813-0464/1/2/10)
Supplement: s1 [file s1]

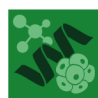

**Table S1.** Table showing the GPCR crystal structures resolved between 2017 and 2021.

| PDB ID | Date | Ligand Bound         | Crystallisation Method | Resolution | Reference |
|--------|------|----------------------|------------------------|------------|-----------|
| 5NX2   | 2017 | Peptide 1            | X-ray diffraction      | 3.7 Å      | [1]       |
| 6KJV   | 2019 | PF-0637222           | X-ray diffraction      | 2.8 Å      | [2]       |
| 6KK1   | 2019 | PF-0637222           | X-ray diffraction      | 2.8 Å      | [2]       |
| 6GB1   | 2018 | Peptide 11           | X-ray diffraction      | 2.73 Å     | [3]       |
| 6KK7   | 2019 | PF-0637222           | X-ray diffraction      | 3.1 Å      | [2]       |
| 6LN2   | 2020 | FAB7F38, PF-06372222 | X-ray diffraction      | 3.2 Å      | [4]       |
| 6ORV   | 2020 | TT-OAD2              | Electron microscopy    | 3.0 Å      | [5]       |
| 6VCB   | 2020 | LSN3160440           | Electron microscopy    | 3.3 Å      | [6]       |
| 6X18   | 2020 | Glp-1                | Electron microscopy    | 2.1 Å      | [7]       |
| 6X19   | 2020 | CHU-128              | Electron microscopy    | 2.1 Å      | [7]       |
| 6X1A   | 2020 | PF-06882961          | Electron microscopy    | 2.5 Å      | [7]       |
| 6XOX   | 2020 | LY3502970            | Electron microscopy    | 3.1 Å      | [8]       |
| 7C2E   | 2020 | RGT1383              | Electron microscopy    | 4.2 Å      | [9]       |
| 7DUQ   | 2021 | Compound 2           | Electron microscopy    | 2.5 Å      | [10]      |
| 7DUR   | 2021 | Compound 2           | Electron microscopy    | 3.3 Å      | [10]      |
| 7E14   | 2021 | Compound 2           | Electron microscopy    | 2.9 Å      | [10]      |
| 7EVM   | 2021 | Compound 2           | Electron microscopy    | 2.5 Å      | [10]      |
| 7KI0   | 2021 | Semaglutide          | Electron microscopy    | 2.5 Å      | [11]      |
| 7KI1   | 2021 | Taspoglutide         | Electron microscopy    | 2.5 Å      | [11]      |
| 7LCI   | 2021 | Pf-06882961          | Electron microscopy    | 2.9 Å      | [12]      |
| 7LCJ   | 2021 | Pf-06882961          | Electron microscopy    | 2.82 Å     | [12]      |
| 7LCK   | 2021 | Pf-06882961          | Electron microscopy    | 3.24 Å     | [12]      |
| 7RTB   | 2021 | Peptide 19           | Electron microscopy    | 2.14 Å     | [13]      |

**Table S2.** The binding energy of the ligands upon docking onto the crystal structures studied.

| Pose | Ligand | Structure | Binding Energy (Kcal/mol) |
|------|--------|-----------|---------------------------|
| 1    | 1      | 5VAI      | -6.46                     |
| 2    | 1      | 5VAI      | -6.34                     |
| 3    | 1      | 5VAI      | -6.25                     |
| 1    | 2      | 5VAI      | -7.55                     |
| 2    | 2      | 5VAI      | -7.45                     |
| 3    | 2      | 5VAI      | -7.37                     |
| 1    | 3      | 5VAI      | -6.44                     |
| 2    | 3      | 5VAI      | -6.31                     |
| 3    | 3      | 5VAI      | -6.28                     |
| 1    | 4      | 5VAI      | -7.20                     |
| 2    | 4      | 5VAI      | -7.159                    |
| 3    | 4      | 5VAI      | -7.157                    |
| 1    | 1      | 6B3J      | -6.70                     |
| 2    | 1      | 6B3J      | -6.59                     |
| 3    | 1      | 6B3J      | -6.43                     |
| 1    | 2      | 6B3J      | -7.67                     |
| 2    | 2      | 6B3J      | -7.59                     |
| 3    | 2      | 6B3J      | -7.45                     |
| 1    | 3      | 6B3J      | -7.27                     |
| 2    | 3      | 6B3J      | -7.12                     |
| 3    | 3      | 6B3J      | -6.92                     |
| 1    | 4      | 6B3J      | -7.95                     |
| 2    | 4      | 6B3J      | -7.77                     |
| 3    | 4      | 6B3J      | -7.73                     |
| 1    | 1      | 5VEW      | -8.50                     |
| 2    | 1      | 5VEW      | -8.18                     |
| 3    | 1      | 5VEW      | -6.26                     |

|   |   |      |        |
|---|---|------|--------|
| 1 | 2 | 5VEW | -7.189 |
| 2 | 2 | 5VEW | -7.066 |
| 3 | 2 | 5VEW | -6.873 |
| 1 | 3 | 5VEW | -7.877 |
| 2 | 3 | 5VEW | -6.866 |
| 3 | 3 | 5VEW | -6.827 |
| 1 | 4 | 5VEW | -9.48  |
| 2 | 4 | 5VEW | -9.27  |
| 3 | 4 | 5VEW | -8.22  |

**Table S3.** Table showing amino acids present in the binding sites for compound **1** Pose 2.

| S/N | 5VAI    | 5VEW    | 6B3J    |
|-----|---------|---------|---------|
| 1   | VAL 331 | TYR 402 | LEU 354 |
| 2   | THR 355 | SER 352 | PHE 390 |
| 3   | LEU 401 | ASN 406 | HIS 363 |
| 4   | TYR 402 | LEU 401 | PHE 393 |
| 5   | LEU 356 | VAL 405 | PRO 358 |
| 6   | SER 352 | LYS 351 | MET 397 |
| 7   | THR 353 | ASN 407 |         |
| 8   | LEU 349 | ARG 348 |         |
| 9   |         | LEU 349 |         |
| 10  |         | ILE 345 |         |
| 11  |         | GLU 408 |         |
| 12  |         | HIS 180 |         |
| 13  |         | ARG 176 |         |

**Table S4.** Table showing amino acids present in the binding sites for compound **1** Pose 3.

| S/N | 5VAI    | 5VEW    | 6B3J    |
|-----|---------|---------|---------|
| 1   | LEU 401 | SER 389 | LEU 359 |
| 2   | PHE 393 | PHE 390 | LEU 401 |
| 3   | GLN 394 | GLN 394 | ASN 406 |
| 4   | PHE 390 | MET 397 | TYR 402 |
| 5   | MET 397 | LEU 396 | LEU 356 |
| 6   | PRO 358 | LEU 359 |         |
| 7   | ILE 357 | PHE 393 |         |
| 8   | THR 355 |         |         |
| 9   | LEU 354 |         |         |
| 10  | LYS 351 |         |         |

**Table S5.** Table showing amino acids present in the binding sites for compound **2** Pose 2.

| S/N | 5VAI    | 5VEW    | 6B3J    |
|-----|---------|---------|---------|
| 1   | PHE 324 | THR 355 | LEU 354 |
| 2   | PHE 321 | PRO 358 | ILE 357 |
| 3   | VAL 365 | PHE 324 | ILE 366 |
| 4   | ILE 357 | LEU 354 | PRO 358 |
| 5   | PHE 390 | ILE 328 | PHE 390 |
| 6   | HIS 363 | VAL 331 |         |
| 7   | GLU 387 |         |         |
| 8   | ILE 366 |         |         |
| 9   | ILE 325 |         |         |

**Table S6.** Table showing amino acids present in the binding sites for compound **2** Pose 3.

| S/N | 5VAI    | 5VEW    | 6B3J    |
|-----|---------|---------|---------|
| 1   | LEU 401 | LEU 359 | MET 397 |
| 2   | LEU 354 | THR 355 | HIS 363 |
| 3   | HIS 363 | LEU 354 | PHE 390 |
| 4   | PHE 390 | VAL 331 | PRO 358 |
| 5   |         | PHE 347 | VAL 405 |
| 6   |         | PHE 324 | LEU 401 |
| 7   |         | PRO 358 | ILE 357 |
| 8   |         |         | LEU 354 |

**Table S7.** Table showing amino acids present in the binding sites for compound **3** Pose 2.

| S/N | 5VAI    | 5VEW    | 6B3J    |
|-----|---------|---------|---------|
| 1   | SER 352 | ARG 348 | LEU 356 |
| 2   | VAL 331 | LEU 349 | LEU 359 |
| 3   | LEU 356 | LYS 351 | GLU 408 |
| 4   |         | LEU 401 | VAL 405 |
| 5   |         | VAL 405 | LEU 401 |
| 6   |         |         | TYR 402 |

**Table S8.** Table showing amino acids present in the binding sites for compound **3** Pose 3.

| S/N | 5VAI    | 5VEW    | 6B3J    |
|-----|---------|---------|---------|
| 1   | ARG 176 | ILE 345 | MET 397 |
| 2   | HIS 180 | VAL 405 | PRO 358 |
| 3   | TYR 402 | LYS 351 | PHE 390 |
| 4   | SER 352 | LEU 401 | PHE 393 |
| 5   | THR 353 | SER 352 | PHE 385 |
| 6   |         | ARG 348 |         |
| 7   |         | ASN 406 |         |

**Table S9.** Table showing amino acids present in the binding sites for compound **4** Pose 2.

| S/N | 5VAI    | 5VEW    | 6B3J    |
|-----|---------|---------|---------|
| 1   | PHE 324 | HIS 363 | LYS 351 |
| 2   | PHE 321 | LEU 359 | ILE 357 |
| 3   | VAL 365 | THR 391 | VAL 405 |
| 4   | ILE 357 | GLN 394 | THR 355 |
| 5   | PHE 390 | LEU 360 | MET 397 |
| 6   | ILE 325 | MET 397 | LEU 401 |
| 7   |         | LEU 396 | PRO 358 |
| 8   |         | PHE 393 | HIS 363 |
| 9   |         | ILE 400 | PHE 390 |

**Table S10.** Table showing amino acids present in the binding sites for compound 4 Pose 3.

| S/N | 5VAI    | 5VEW    | 6B3J    |
|-----|---------|---------|---------|
| 1   | LEU 251 | LYS 351 | ILE 357 |
| 2   | LEU 356 | LEU 401 | LYS 351 |
| 3   | THR 355 | VAL 405 | THR 355 |
| 4   | LYS 351 | ARG 348 | LEU 354 |
| 5   |         | LEU 349 | LEU 401 |
| 6   |         |         | MET 397 |
| 7   |         |         | PRO 358 |
| 8   |         |         | HIS 363 |
|     |         |         | PHE 390 |

## References

- Jazayeri, A.; Rappas, M.; Brown, A.J.H.; Kean, J.; Errey, J.C.; Robertson, N.J.; Fiez-Vandal, C.; Andrews, S.P.; Congreve, M.; Bortolato, A.; et al. Crystal structure of the GLP-1 receptor bound to a peptide agonist. *Nature* **2017**, *546*, 254–258, doi:10.1038/nature22800.
- Xu, Y.; Wang, Y.; Liu, K.; Peng, Y.; Yao, D.; Tao, H.; Liu, H.; Song, G. Mutagenesis facilitated crystallization of GLP-1R. *IUCr* **2019**, *6*, 996–1006.
- Evers, A.; Bossart, M.; Pfeiffer-Marek, S.; Elvert, R.; Schreuder, H.; Kurz, M.; Stengelin, S.; Lorenz, M.; Herling, A.; Konkar, A.; et al. Dual Glucagon-like Peptide 1 (GLP-1)/Glucagon Receptor Agonists Specifically Optimized for Multidose Formulations. *J. Med. Chem.* **2018**, *61*, 5580–5593, doi:10.1021/acs.jmedchem.8b00292.
- Wu, F.; Yang, L.; Hang, K.; Laursen, M.; Wu, L.; Han, G.W.; Ren, Q.; Roed, N.K.; Lin, G.; Hanson, M.A.; et al. Full-length human GLP-1 receptor structure without orthosteric ligands. *Nat. Commun.* **2020**, *11*, 1272, doi:10.1038/s41467-020-14934-5.
- Zhao, P.; Liang, Y.-L.; Belousoff, M.J.; Deganutti, G.; Fletcher, M.M.; Willard, F.S.; Bell, M.G.; Christe, M.E.; Sloop, K.W.; Inoue, A.; et al. Activation of the GLP-1 receptor by a non-peptidic agonist. *Nature* **2020**, *577*, 432–436, doi:10.1038/s41586-019-1902-z.
- Bueno, A.B.; Sun, B.; Willard, F.S.; Feng, D.; Ho, J.D.; Wainscott, D.B.; Showalter, A.D.; Vieth, M.; Chen, Q.; Stutsman, C.; et al. Structural insights into probe-dependent positive allosterism of the GLP-1 receptor. *Nat. Chem. Biol.* **2020**, *16*, 1105–1110, doi:10.1038/s41589-020-0589-7.
- Zhang, X.; Belousoff, M.J.; Zhao, P.; Kooistra, A.J.; Truong, T.T.; Ang, S.Y.; Underwood, C.R.; Egebjerg, T.; Šenel, P.; Stewart, G.D.; et al. Differential GLP-1R Binding and Activation by Peptide and Non-peptide Agonists. *Mol. Cell* **2020**, *80*, 485–500, doi:10.1016/j.molcel.2020.09.020.
- Kawai, T.; Sun, B.; Yoshino, H.; Feng, D.; Suzuki, Y.; Fukazawa, M.; Nagao, S.; Wainscott, D.B.; Showalter, A.D.; Droz, B.A.; et al. Structural basis for GLP-1 receptor activation by LY3502970, an orally active nonpeptide agonist. *PNAS* **2020**, *117*, 29959, doi:10.1073/pnas.2014879117.
- Ma, H.; Huang, W.; Wang, X.; Zhao, L.; Jiang, Y.; Liu, F.; Guo, W.; Sun, X.; Zhong, W.; Yuan, D.; et al. Structural insights into the activation of GLP-1R by a small molecule agonist. *Cell Res.* **2020**, *30*, 1140–1142, doi:10.1038/s41422-020-0384-8.
- Cong, Z.; Chen, L.-N.; Ma, H.; Zhou, Q.; Zou, X.; Ye, C.; Dai, A.; Liu, Q.; Huang, W.; Sun, X.; et al. Molecular insights into allosteric modulation of the human glucagon-like peptide-1 receptor. *Nat. Commun.* **2021**, *12*, 3763, doi:10.1038/s41467-021-24058-z.
- Zhang, X.; Belousoff, M.J.; Liang, Y.-L.; Danev, R.; Sexton, P.M.; Wootten, D. Structure and dynamics of semaglutide- and tasoglutide-bound GLP-1R-Gs complexes. *Cell Rep.* **2021**, *36*, doi:10.1016/j.celrep.2021.109374.
- Zhang, X.; Johnson, R.M.; Drulyte, I.; Yu, L.; Kotecha, A.; Danev, R.; Wootten, D.; Sexton, P.M.; Belousoff, M.J. Evolving cryo-EM structural approaches for GPCR drug discovery. *Structure* **2021**, *29*, 963–974, doi:10.1016/j.str.2021.04.008.
- Johnson, R.M.; Zhang, X.; Piper, S.J.; Nettleton, T.J.; Vandekolk, T.H.; Langmead, C.J.; Danev, R.; Sexton, P.M.; Wootten, D. Cryo-EM structure of the dual incretin receptor agonist, peptide-19, in complex with the glucagon-like peptide-1 receptor. *Biochem. Biophys. Commun.* **2021**, *578*, 84–90, doi:https://doi.org/10.1016/j.bbrc.2021.09.016.
